# Supplementary material for: Multiwalled carbon nanotube based aromatic volatile organic compound sensor: sensitivity enhancement through 1-hexadecanethiol functionalisation
Source: publisher site journal article supplement (doi:10.3762/bjnano.10.227), 2019-12-04
Supplement: Additional file 1 [file 2190-4286-10-227-S1.pdf]

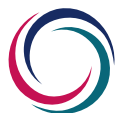

## Supporting Information

for

### **Multiwalled carbon nanotube based aromatic volatile organic compound sensor: sensitivity enhancement through 1-hexadecanethiol functionalisation**

Nadra Bohli, Meryem Belkilani, Juan Casanova-Chafer, Eduard Llobet and Adnane Abdelghani

*Beilstein J. Nanotechnol.* **2019**, *10*, 2364–2373. doi:10.3762/bjnano.10.227

### **Details on the HDT/Au-MWCNT sensor fabrication process and its response to methanol and acetone vapours**

### Detailed description of the MWCNT oxygen plasma treatment

MWCNTs were placed in an ATC Orion-8-HV multi-target sputtering machine chamber under a controlled flow of oxygen and argon (AJA International, Inc., USA). The sputtering machine parameters were set at a pressure of 0.1 Torr and a power of 15 W for 1 min. The plasma was coupled inductively at a frequency of 13.56 MHz. The resulting functional oxygen species created on the carbon nanotube sidewalls were carboxyl, carbonyl and hydroxyl groups.

### Sensor response to methanol and acetone vapors

The figures related to HDT/Au-MWCNTs sensor response to methanol and acetone vapours are presented respectively in Figures S1 and S2.

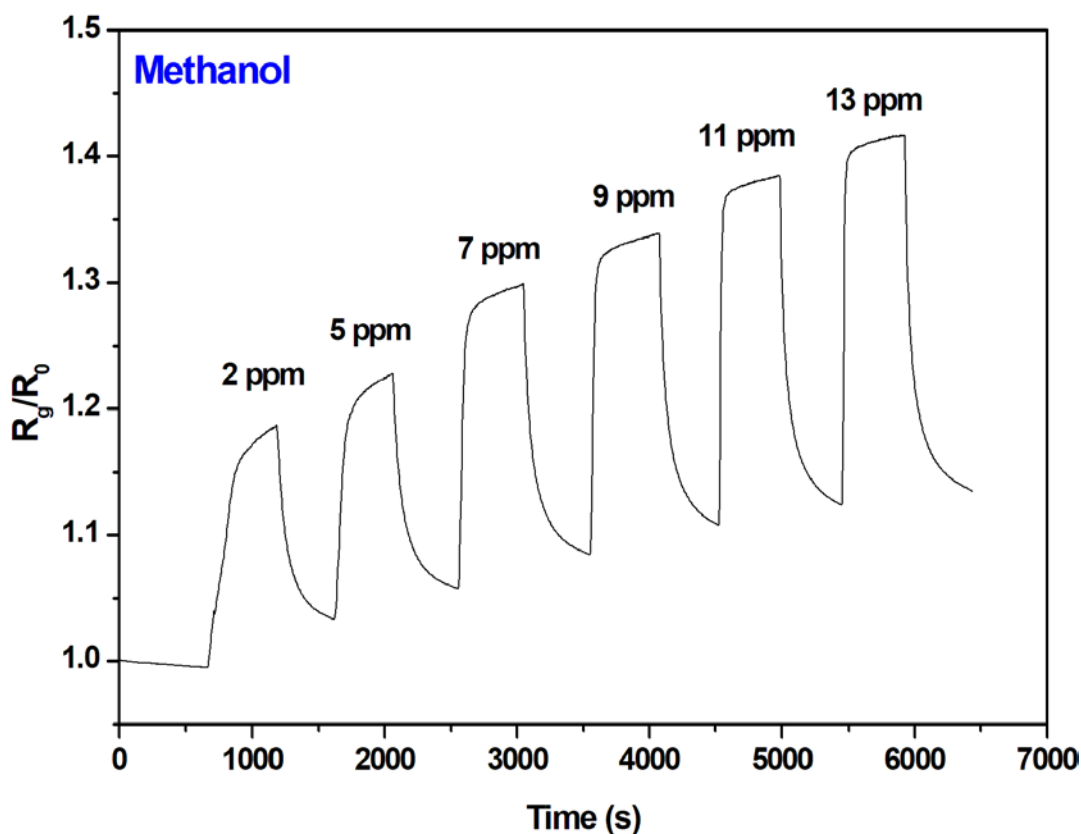

**Figure S1:** HDT/Au-MWCNT sensor response for methanol nonaromatic VOC detection.

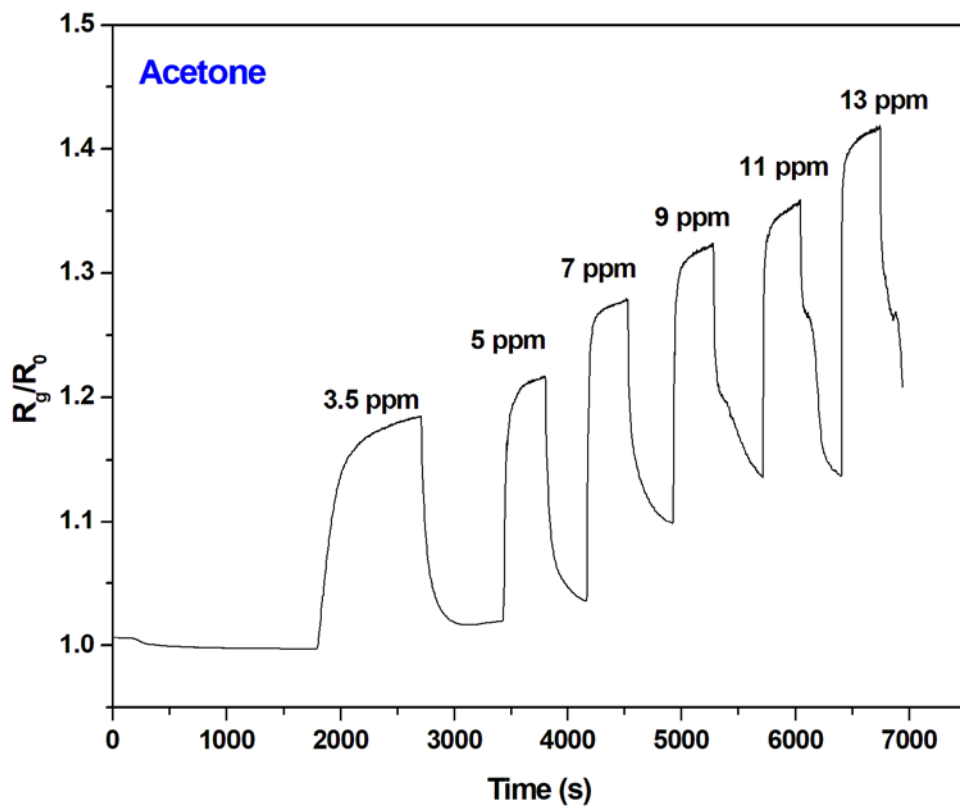

**Figure S2:** HDT/Au-MWCNT sensor for acetone nonaromatic VOC detection.
